# Supplementary material
Source: publisher figshare collection journal article supplement (https://acs.figshare.com/ndownloader/files/8430692)
Supplement: Supplementary file 1 [file 8430692]

Compounds,Smiles,Chirality,PI3K? pKi,IL-6 release pIC50
2,Nc1ncnc(c12)n(cn2)Cc(n(c3=O)-c(c4C)cccc4)nc(c35)cccc5C,aS,7.9 ± 0.03,7.6 ± 0.1
3,Nc1ncnc(c12)n(cn2)Cc(n(c3=O)-c(c4C)cccc4)nc(c35)cccc5C,aR,7.7 ± 0.1,7.3 ± 0.1
4,Nc1ncnc(c12)n(cn2)Cc(nc(c34)cccc3C)n(c4=O)-c5ccccc5,-,7.6 ± 0.1,7.3 ± 0.4
5,Nc1ncnc(c12)n(cn2)[C@@H](C)c(n(c3=O)-c(c4C)cccc4)nc(c35)cccc5C,"aS, S",8.5 ± 0.1,8.2 ± 0.5
6,Nc1ncnc(c12)n(cn2)[C@H](C)c(n(c3=O)-c(c4C)cccc4)nc(c35)cccc5C,"aS, R",6.9 ± 0.04,NT
7,Nc1ncnc(c12)n(cn2)[C@@H](C)c(n(c3=O)-c(c4C)cccc4)nc(c35)cccc5C,"aR, S",8.8 ± 0.1,8.9 ± 0.1
8,Nc1ncnc(c12)n(cn2)[C@H](C)c(n(c3=O)-c(c4C)cccc4)nc(c35)cccc5C,"aR, R",7.9 ± 0.03,NT
